# Supplementary material for: Disagreements in risk of bias assessment for randomised controlled trials included in more than one Cochrane systematic reviews: a research on research study using cross-sectional design
Source: PubMed Central journal article supplement — BMJ Open. 2019 Apr 1;9(4):e028382. doi: 10.1136/bmjopen-2018-028382 (PMC6500379; doi:10.1136/bmjopen-2018-028382), 2019-04-01
Supplement: bmjopen-2018-028382supp002.pdf [file bmjopen-2018-028382supp002.pdf]

| <b>Cochrane Group</b>                                  | <b>Number of reviews</b> | <b>% on the total</b> |
|--------------------------------------------------------|--------------------------|-----------------------|
| Pregnancy and Childbirth                               | 93                       | 11.7%                 |
| Airways                                                | 48                       | 6.0%                  |
| Pain, Palliative and Supportive Care Group             | 42                       | 5.3%                  |
| Acute Respiratory Infections                           | 37                       | 4.6%                  |
| Gynaecology and Fertility                              | 29                       | 3.6%                  |
| Neonatal                                               | 29                       | 3.6%                  |
| Tobacco Addiction                                      | 27                       | 3.4%                  |
| Stroke                                                 | 25                       | 3.1%                  |
| Gynaecological, Neuro-oncology and Orphan Cancer Group | 23                       | 2.9%                  |
| Wounds                                                 | 23                       | 2.9%                  |
| Hepato-Biliary                                         | 22                       | 2.8%                  |
| Cystic Fibrosis and Genetic Disorders                  | 21                       | 2.6%                  |
| Anaesthesia                                            | 20                       | 2.5%                  |
| Drugs and Alcohol                                      | 20                       | 2.5%                  |
| Neuromuscular                                          | 19                       | 2.4%                  |
| Common Mental Disorders                                | 18                       | 2.3%                  |
| Fertility Regulation                                   | 18                       | 2.3%                  |
| Heart                                                  | 17                       | 2.1%                  |
| Developmental, Psychosocial and Learning Problems      | 16                       | 2.0%                  |
| Incontinence                                           | 16                       | 2.0%                  |
| Kidney disease                                         | 16                       | 2.0%                  |
| Schizophrenia                                          | 16                       | 2.0%                  |
| Infectious Diseases                                    | 15                       | 1.9%                  |
| Oral Health                                            | 14                       | 1.8%                  |
| Vascular                                               | 14                       | 1.8%                  |
| Dementia and Cognitive Improvement                     | 13                       | 1.6%                  |
| Musculoskeletal                                        | 12                       | 1.5%                  |
| Consumers and Communication                            | 10                       | 1.3%                  |
| Epilepsy                                               | 10                       | 1.3%                  |
| Eyes and Vision                                        | 9                        | 1.1%                  |
| Metabolic and Endocrine Disorders                      | 9                        | 1.1%                  |
| Back and Neck                                          | 8                        | 1.0%                  |
| Hypertension                                           | 8                        | 1.0%                  |
| Multiple Sclerosis                                     | 8                        | 1.0%                  |
| Effective Practice and Organisation of Care            | 7                        | 0.9%                  |
| HIV/AIDS                                               | 7                        | 0.9%                  |
| Inflammatory Bowel Disease                             | 7                        | 0.9%                  |
| Injuries                                               | 7                        | 0.9%                  |
| Bone, Joint and Muscle Trauma Group                    | 6                        | 0.8%                  |
| ENT                                                    | 6                        | 0.8%                  |
| Haematological Malignancies                            | 6                        | 0.8%                  |

| <b>Cochrane Group</b>            | <b>Number of reviews</b> | <b>% on the total</b> |
|----------------------------------|--------------------------|-----------------------|
| Breast Cancer                    | 5                        | 0.6%                  |
| Colorectal Cancer                | 5                        | 0.6%                  |
| Lung Cancer                      | 3                        | 0.4%                  |
| Movement Disorders               | 3                        | 0.4%                  |
| Skin                             | 3                        | 0.4%                  |
| Occupational Health              | 2                        | 0.3%                  |
| Sexually Transmitted Infections  | 2                        | 0.3%                  |
| Public Health                    | 1                        | 0.1%                  |
| Upper GI and Pancreatic Diseases | 1                        | 0.1%                  |
| Urology                          | 1                        | 0.1%                  |
| <b>Total</b>                     | <b>797</b>               |                       |
