# Supplementary figures and images for: Disagreements in risk of bias assessment for randomised controlled trials included in more than one Cochrane systematic reviews: a research on research study using cross-sectional design
Source: PubMed Central journal article supplement — BMJ Open. 2019 Apr 1;9(4):e028382. doi: 10.1136/bmjopen-2018-028382 (PMC6500379; doi:10.1136/bmjopen-2018-028382), 2019-04-01

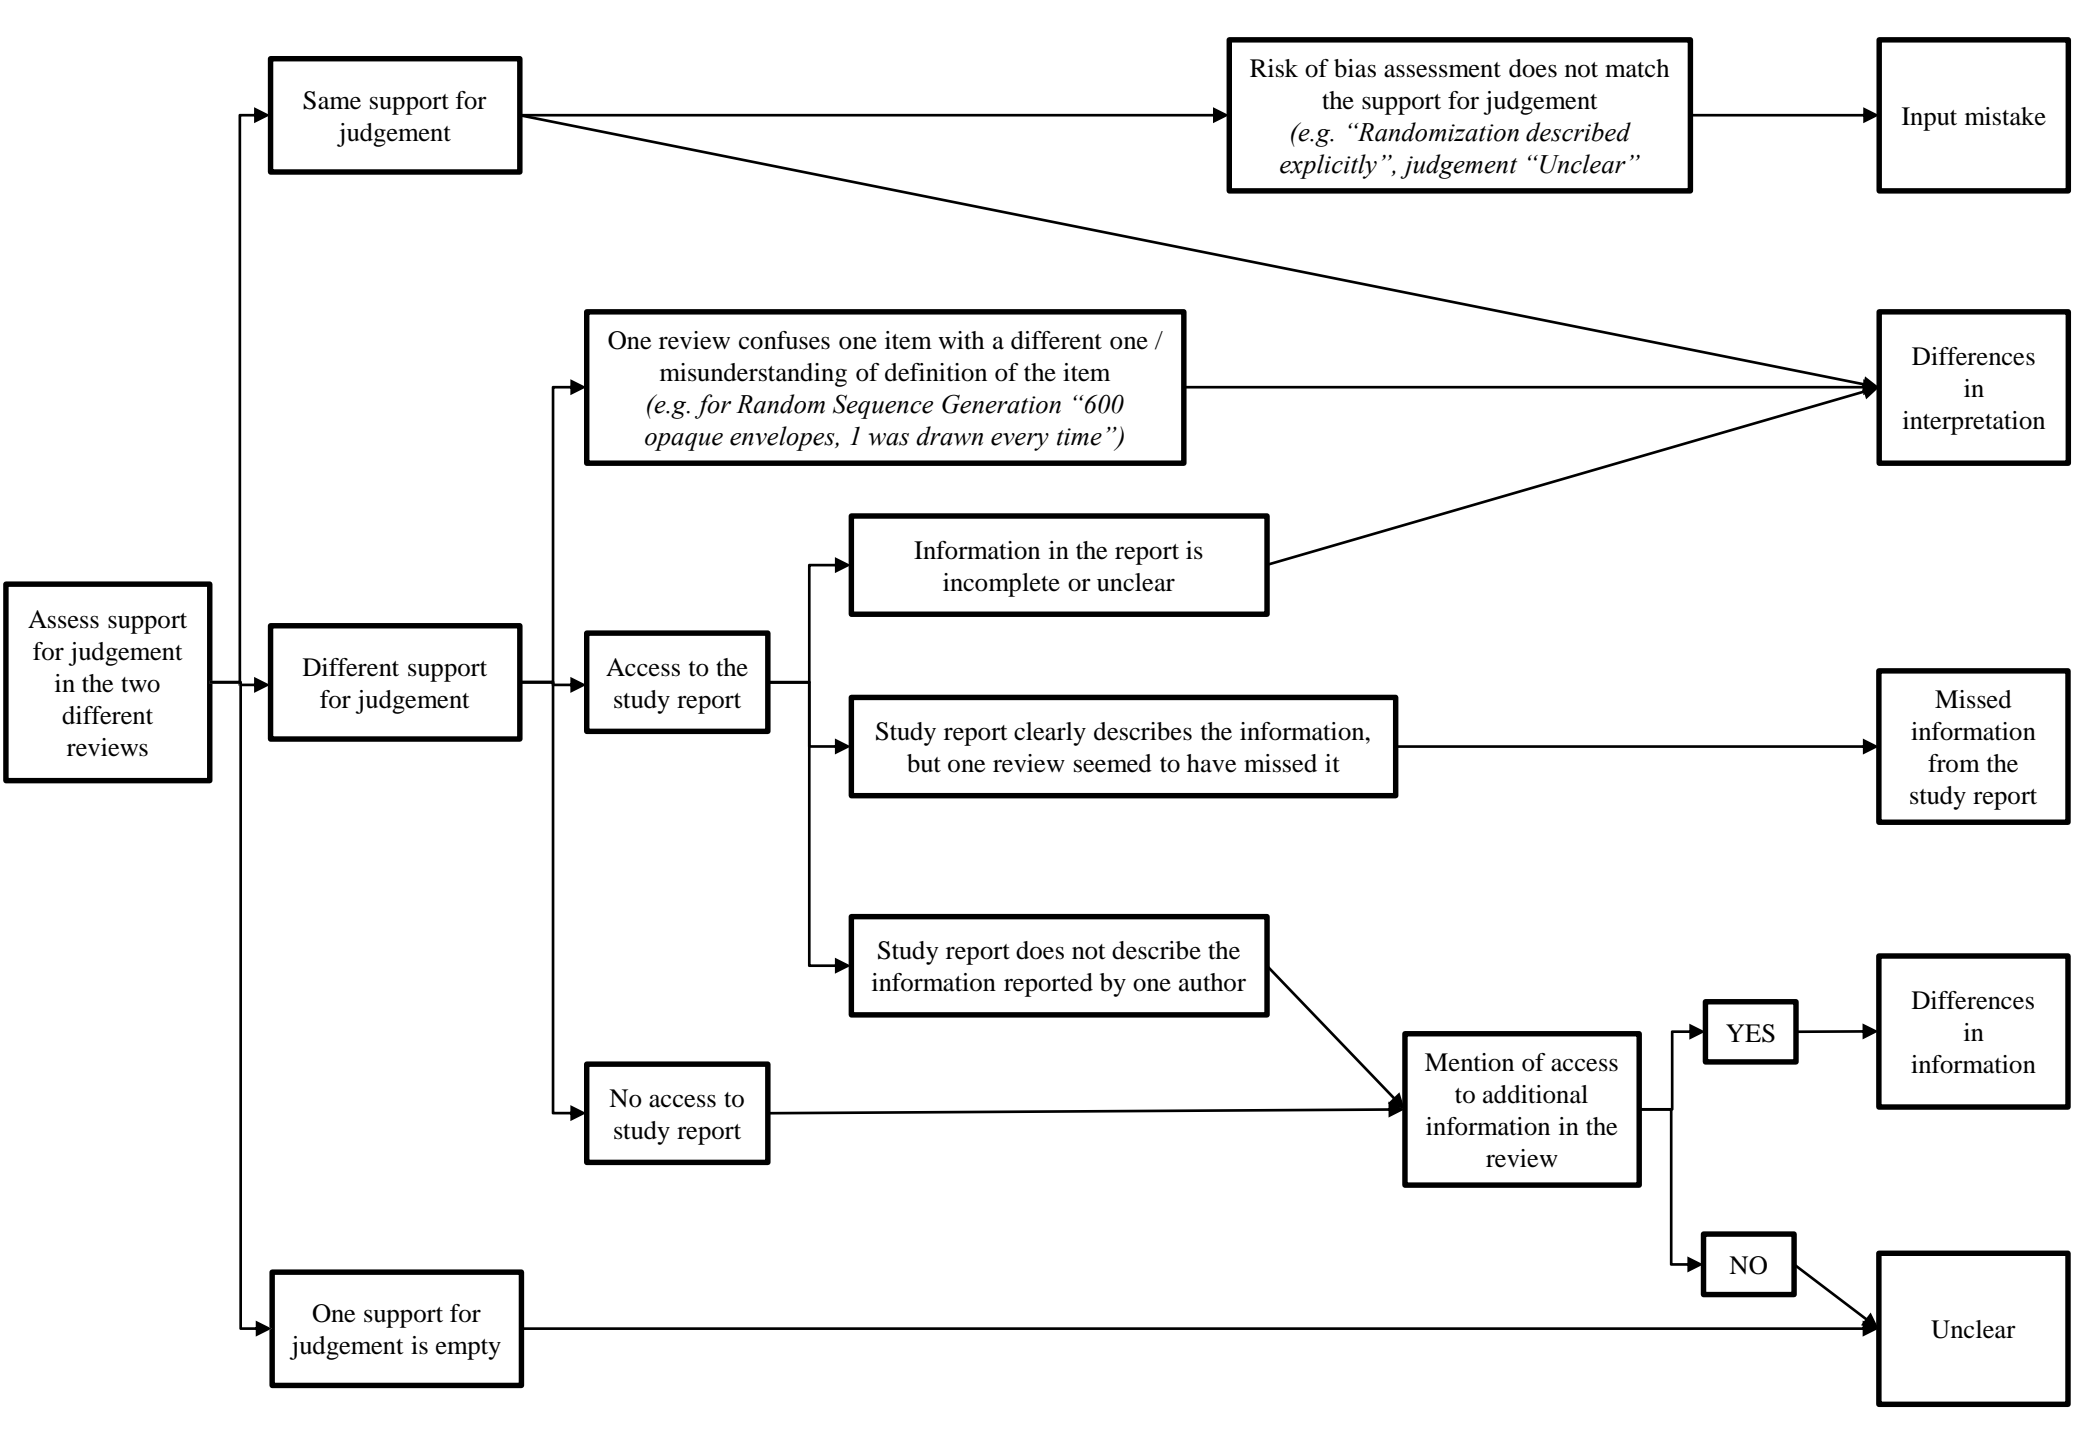

Supplement: bmjopen-2018-028382supp001.pdf [file bmjopen-2018-028382supp001.pdf]

■ Agreement     
 ■ Low vs High     
 ■ Low vs Unclear     
 ■ Unclear vs High

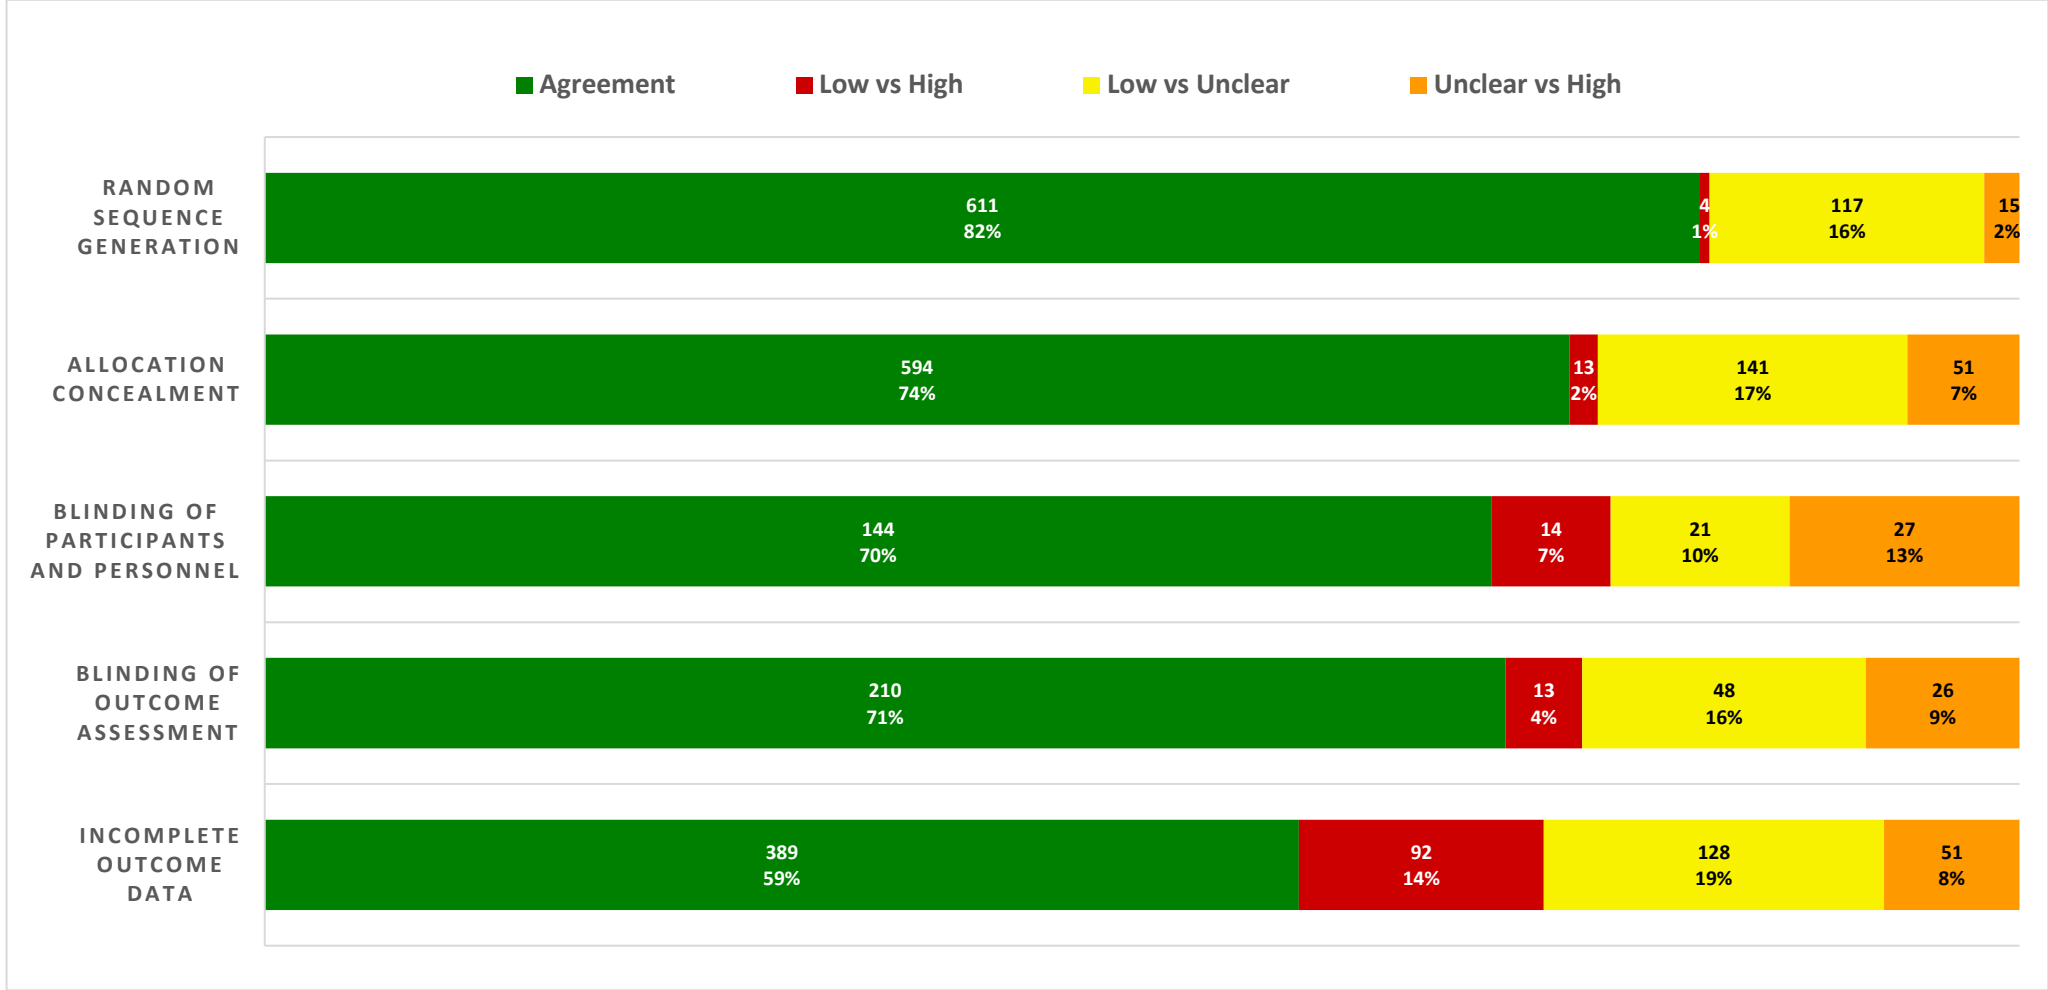

Supplement: bmjopen-2018-028382supp003.pdf [file bmjopen-2018-028382supp003.pdf]
